# Supplementary material
Source: PubMed Central journal article supplement (PMC5210245)
Supplement: 2016_152256-Disclosures_and_Contributions.pdf [file 2016_152256-Disclosures_and_Contributions.pdf]

Haematologica  
HAEMATOL/2016/152256  
Version 4

Mediastinal Grey Zone Lymphoma: clinico-pathological characteristics and outcomes of 99 patients from the LYSA.

Clémentine Sarkozy, Thierry Molina, Hervé Ghesquières, Anne-Sophie Michallet, Jehan Dupuis, Diane Damotte, Franck Morsschauser, Marie Parrens, Laurent Martin, Peggy Dartigues, Aspasia Stamatoullas, Pierre Hirsch, Betina Fabiani, Krimo Bouabdallah, Maria Gomes da Silva, Marie Maerevoet, Camille Laurent, Bertrand Coiffier, Gilles Salles, and Alexandra Traverse-Glehen

Disclosures: The study was funded by Sandoz and Takeda

Contributions: CS and ATG designed the study. ATG chaired the pathological review group. ATG, TJM, DC, DD, MP, LM, PD, CL, and BF contributed to the pathological review and case inclusion. CS, GS, FM, HG, ASM, FM, JD, BC, PH, MGDS, ASM, KB, and MM collected clinical data. CS and ATG assembled the data. CS, ATG and GS analyzed the data. All the authors contributed to the writing of the manuscript and approved the final version
